# Supplementary material
Source: PubMed Central journal article supplement (PMC4693985)
Supplement: IAI.00939-15_zii999091531so1.pdf [file IAI.00939-15_zii999091531so1.pdf]

## Supporting Information

**Fig. S1.** Separation of biologically active proteases in 18h LB and BHI culture cell-free supernatants by native PAGE. Post-run gel overlain on 1% milk LB agar showing proteolytic activity as indicated by clearing zones corresponding to protein bands of PA14 WT and *aprA::Tn* LB and BHI 18h culture cell-free supernatants.

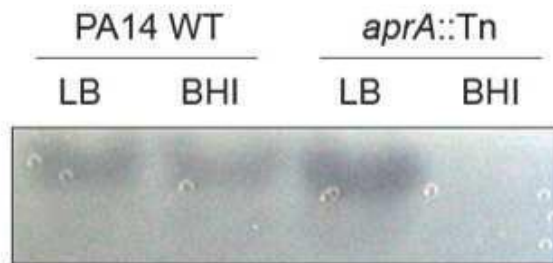

**Fig. S2.** SDS PAGE separation of *aprA::Tn* proteins. Comparison of whole supernatant samples (Sup) against native PAGE (NP) excised samples. For the latter, bands corresponding to proteolytic portions of the native gel from Figure S1 were excised and loaded onto the SDS PAGE gel. The 33kD band subjected to mass spectrometry analysis is indicated by an asterisk. An identical 33-kDa band was observed for PA14 WT in both LB and BHI Sup and NP samples (not shown).

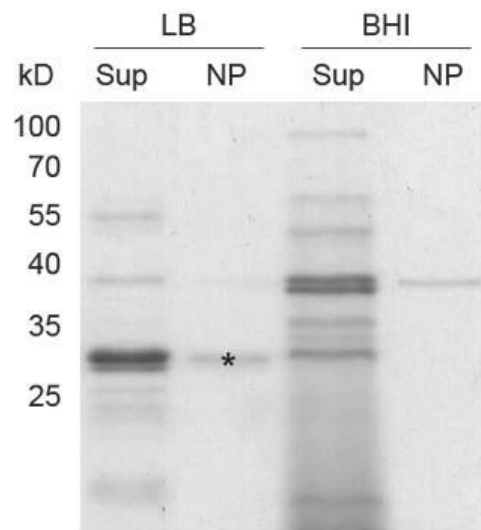

**Table S1.** Selected PA14 transposon mutants based on fold changes of induced IL-8 response in A549-Gluc cells

| Locus name | Gene name   | Gene product description                                 | IL-8 fold difference to PA14 WT <sup>a</sup> |
|------------|-------------|----------------------------------------------------------|----------------------------------------------|
| PA14_00760 |             | hypothetical protein                                     | 0.628                                        |
| PA14_02300 |             | putative short-chain dehydrogenase                       | 0.615                                        |
| PA14_03900 | <i>spuC</i> | putrescine aminotransferase                              | 0.433                                        |
| PA14_04820 |             | putative transcriptional regulator, TetR family          | 0.615                                        |
| PA14_05220 |             | cystathionine beta-synthase                              | 2.379                                        |
| PA14_05450 |             | conserved hypothetical protein                           | 0.549                                        |
| PA14_05560 |             | putative ATP-dependent RNA helicase, DEAD box family     | 0.485                                        |
| PA14_05910 |             | putative bacterial periplasmic transport system          | 0.536                                        |
| PA14_06830 | <i>norB</i> | nitric-oxide reductase subunit B                         | 0.484                                        |
| PA14_06950 |             | putative transcriptional regulator, LuxR family          | 0.521                                        |
| PA14_07370 |             | conserved hypothetical protein                           | 0.601                                        |
| PA14_07400 |             | hypothetical protein                                     | 0.412                                        |
| PA14_07740 | <i>pdxA</i> | pyridoxal phosphate biosynthetic protein PdxA            | 0.358                                        |
| PA14_07940 | <i>trpE</i> | anthranilate synthetase component I                      | 0.624                                        |
| PA14_08500 |             | putative integral membrane protein                       | 0.536                                        |
| PA14_10440 |             | putative porin                                           | 0.497                                        |
| PA14_11290 |             | putative permease                                        | 0.549                                        |
| PA14_11700 |             | conserved hypothetical protein                           | 0.733                                        |
| PA14_11900 |             | hypothetical protein                                     | 0.321                                        |
| PA14_13090 |             | probable 3-ketoacyl-CoA thiolase                         | 0.484                                        |
| PA14_14380 |             | putative transmembrane component of ABC transporter      | 0.497                                        |
| PA14_14420 |             | hypothetical protein                                     | 0.321                                        |
| PA14_15840 |             | conserved hypothetical protein                           | 0.497                                        |
| PA14_16360 |             | putative oxidase                                         | 0.456                                        |
| PA14_16470 |             | putative chemotaxis sensor/effector fusion protein       | 0.471                                        |
| PA14_16780 |             | putative cytochrome P450                                 | 0.769                                        |
| PA14_16980 |             | conserved hypothetical protein                           | 0.503                                        |
| PA14_18600 |             | putative ABC transporter, ATP-binding protein            | 0.814                                        |
| PA14_18720 |             | putative outer membrane protein precursor, OmpA family   | 1.683                                        |
| PA14_20380 | <i>phnI</i> | putative phosphonate metabolism protein                  | 0.796                                        |
| PA14_20700 |             | putative glycosyltransferase                             | 1.379                                        |
| PA14_20730 | <i>flgM</i> | putative negative regulator of flagellin synthesis, FlgM | 0.471                                        |
| PA14_20960 |             | putative isomerase                                       | 0.506                                        |
| PA14_23470 | <i>wbpM</i> | nucleotide sugar epimerase/dehydratase WbpM              | 0.501                                        |
| PA14_24290 | <i>gbt</i>  | glycine betaine transmethylase                           | 0.448                                        |
| PA14_25220 |             | conserved hypothetical protein                           | 0.285                                        |
| PA14_25390 | <i>sth</i>  | soluble pyridine nucleotide transhydrogenase             | 0.376                                        |
| PA14_25830 |             | conserved hypothetical protein                           | 0.412                                        |
| PA14_26230 | <i>hisQ</i> | histidine transport system permease protein              | 2.071                                        |

|            |              |                                                                                  |       |
|------------|--------------|----------------------------------------------------------------------------------|-------|
| PA14_26330 |              | putative transcriptional regulator, AraC family                                  | 0.673 |
| PA14_26670 |              | putative biotin carboxylase/biotin carboxyl carrier protein                      | 0.641 |
| PA14_26760 |              | putative transcriptional regulator                                               | 0.628 |
| PA14_27070 |              | putative membrane protein                                                        | 0.615 |
| PA14_27280 |              | putative transcriptional regulator, LysR family                                  | 0.471 |
| PA14_27770 |              | putative ABC transporter, ATP-binding protein                                    | 0.43  |
| PA14_29410 |              | putative serine/threonine dehydratase                                            | 0.646 |
| PA14_29940 | <i>nuoG</i>  | NADH dehydrogenase I chain G                                                     | 0.412 |
| PA14_30280 | <i>trxB1</i> | thioredoxin reductase 1                                                          | 0.656 |
| PA14_31840 |              | putative protease                                                                | 0.825 |
| PA14_31990 | <i>czcB</i>  | cobalt/zinc/cadmium efflux RND transporter, membrane fusion protein, CzcB family | 0.484 |
| PA14_32590 |              | probable thiol:disulfide interchange protein                                     | 0.412 |
| PA14_32890 |              | hypothetical protein                                                             | 2.191 |
| PA14_33650 | <i>pvdD</i>  | pyoverdine synthetase D                                                          | 0.045 |
| PA14_33820 | <i>pvdQ</i>  | penicillin acylase-related protein                                               | 1.412 |
| PA14_33890 |              | putative oxidoreductase                                                          | 0.726 |
| PA14_35290 | <i>gnd</i>   | gluconate dehydrogenase                                                          | 0.664 |
| PA14_36870 |              | putative short-chain dehydrogenase                                               | 1.188 |
| PA14_37310 |              | putative allophanate hydrolase subunit 2                                         | 0.654 |
| PA14_37880 |              | putative binding protein component of ABC transporter                            | 0.521 |
| PA14_38110 |              | putative transporter, sodium-dicarboxylate symporte                              | 0.358 |
| PA14_41090 | <i>mltD</i>  | membrane-bound lytic murein transglycosylase D precursor                         | 0.43  |
| PA14_41390 | <i>ppiB</i>  | peptidyl-prolyl cis-trans isomerase B                                            | 0.412 |
| PA14_41500 |              | putative lyase                                                                   | 0.832 |
| PA14_43380 | <i>kdpB</i>  | potassium-transporting ATPase, B chain                                           | 0.575 |
| PA14_43920 | <i>braB</i>  | branched chain amino acid transporter                                            | 0.213 |
| PA14_44420 |              | putative ferredoxin                                                              | 0.778 |
| PA14_44960 |              | putative phosphatase                                                             | 0.673 |
| PA14_45630 | <i>fliA</i>  | motility sigma factor FliA                                                       | 0.321 |
| PA14_45680 | <i>fliH</i>  | flagellar biosynthesis protein FliH                                              | 0.592 |
| PA14_45760 | <i>fliQ</i>  | flagellar biosynthetic protein FliQ                                              | 0.506 |
| PA14_45770 | <i>fliP</i>  | flagellar biosynthetic protein FliP                                              | 0.121 |
| PA14_46960 | <i>ggt</i>   | gamma-glutamyltranspeptidase precursor                                           | 0.412 |
| PA14_47300 | <i>phnW</i>  | 2-aminoethylphosphonate:pyruvate aminotransferase                                | 0.376 |
| PA14_49930 |              | conserved hypothetical protein                                                   | 0.471 |
| PA14_50080 | <i>fliJ</i>  | flagellar protein FliJ                                                           | 0.421 |
| PA14_50130 | <i>fliG</i>  | flagellar motor switch protein FliG                                              | 0.355 |
| PA14_50140 | <i>fliF</i>  | Flagella M-ring outer membrane protein precursor                                 | 0.547 |
| PA14_50200 | <i>fleS</i>  | two-component sensor                                                             | 0.556 |
| PA14_50220 | <i>fleQ</i>  | transcriptional regulator FleQ                                                   | 0.563 |
| PA14_50340 | <i>flgL</i>  | flagellar hook-associated protein type 3 FlgL                                    | 2.179 |
| PA14_50360 | <i>flgK</i>  | flagellar hook-associated protein 1 FlgK                                         | 1.717 |

|            |              |                                                                                  |       |
|------------|--------------|----------------------------------------------------------------------------------|-------|
| PA14_50380 | <i>flgJ</i>  | flagellar protein FlgJ                                                           | 0.394 |
| PA14_50460 | <i>flgD</i>  | flagellar basal-body rod modification protein FlgD                               | 1.429 |
| PA14_50470 | <i>flgC</i>  | flagellar basal-body rod protein FlgC                                            | 0.484 |
| PA14_50480 | <i>flgB</i>  | flagellar basal-body rod protein FlgB                                            | 0.295 |
| PA14_50700 |              | conserved hypothetical protein                                                   | 0.542 |
| PA14_51310 |              | conserved hypothetical protein                                                   | 0.521 |
| PA14_51880 | <i>oprD</i>  | Basic amino acid, basic peptide and imipenem outer membrane porin OprD precursor | 1.308 |
| PA14_52050 | <i>purN</i>  | phosphoribosylaminoimidazole synthetase                                          | 0.305 |
| PA14_52610 |              | possible threonine aldolase                                                      | 0.557 |
| PA14_53000 | <i>phhB</i>  | pterin-4-alpha-carbinolamine dehydratase                                         | 0.503 |
| PA14_54390 | <i>mucD</i>  | serine protease MucD precursor                                                   | 0.43  |
| PA14_56000 |              | chemotactic transducer PctA                                                      | 1.274 |
| PA14_56620 |              | putative transcriptional regulator                                               | 0.267 |
| PA14_57100 | <i>ampG</i>  | putative permease                                                                | 1.825 |
| PA14_57950 |              | putative ribosomal subunit interface protein                                     | 0.434 |
| PA14_59240 | <i>pilL2</i> | type IV B pilus protein                                                          | 0.448 |
| PA14_59840 |              | Conserved hypothetical protein                                                   | 0.556 |
| PA14_61020 |              | ankyrin-like protein                                                             | 0.303 |
| PA14_61950 |              | hypothetical protein                                                             | 0.628 |
| PA14_62770 | <i>nusA</i>  | N utilization substance protein A                                                | 0.537 |
| PA14_63250 |              | putative acyl-CoA thiolase                                                       | 0.466 |
| PA14_63480 |              | putative amino acid permease                                                     | 0.358 |
| PA14_63730 |              | putative transporter                                                             | 0.562 |
| PA14_65170 | <i>rpsR</i>  | 30S ribosomal protein S18                                                        | 0.556 |
| PA14_65320 | <i>miaA</i>  | delta 2-isopentenylpyrophosphate transferase                                     | 0.487 |
| PA14_65350 | <i>mutL</i>  | DNA mismatch repair protein MutL                                                 | 0.601 |
| PA14_65770 | <i>aspC</i>  | aspartate transaminase                                                           | 0.747 |
| PA14_67540 |              | conserved hypothetical protein                                                   | 0.539 |
| PA14_68900 |              | putative iron ABC transporter, periplasmic iron-binding protein                  | 0.654 |
| PA14_69950 |              | putative acetyl-CoA hydrolase/transferase                                        | 0.394 |
| PA14_71650 | <i>aspA</i>  | aspartate ammonia-lyase                                                          | 0.638 |
| PA14_72510 | <i>thrB</i>  | homoserine kinase                                                                | 0.588 |

<sup>a</sup> Mean values of two biological replicas
